# Supplementary material for: COVID-19 and Vaccination: Knowledge, Attitudes and Practices of People Working on Illegal Gold Mining Sites in French Guiana
Source: MDPI journal article supplement (doi:10.3390/vaccines11071265), 2023-07-21
Supplement: s1 [file s1]

# CPF Knowledges, attitudes and practices about Covid-19 of people working on illegal gold mining sites in French Guiana.

## A - Inclusion criteria

**1 - Have you worked in an illegal gold mining site in French Guiana since March 2020 (Beginning of the sanitary lockdown in French Guiana and Brazil and closure of Guianese borders)?** (Only one answer)

☐ Yes ☐ No

**2 - Did you work on this site for more than 1 month from March 2020?** (Only one answer)

☐ Yes ☐ No

**3 - How old are you?** \_\_\_\_\_

**4 - Do you agree to participate in this research conducted by Cayenne Hospital (French Guiana)** (One answer only)

☐ Yes ☐ No

**5 - Is this the first time you are participating in this study?** (Only one answer)

☐ Yes ☐ No

**Collection of informed consent?** (Only one answer)

☐ Yes ☐ No

**Patient Inclusion** (One Response Only)

☐ Yes ☐ No

**If yes :**

**Date of inclusion :** \_\_\_\_/\_\_\_\_/\_\_\_\_

**Name of the person performing the inclusion:**

\_\_\_\_\_

**Patient anonymity number :**

\_\_\_\_\_

**Place of recruitment :** (Only one answer)

☐ CDPS of Maripasoula ☐ City of Maripasoula ☐ Antonio Do Brinco ☐ Ronaldo

☐ Other: \_\_\_\_\_

## B - Socio-demographic criteria

**6 -You are :** (Only one answer)

☐ A man ☐ A woman

☐ Other: \_\_\_\_\_

**7 – Where were you born ?** (Only one answer)

☐ Brazil ☐ Suriname ☐ French Guiana ☐ Guyana ☐ Venezuela ☐ France

☐ Another South American country

☐ Other: \_\_\_\_\_

**7 - A - If Brazil, specify region:** (One answer only)

☐ Amapa ☐ Para ☐ Roraima ☐ Maranhão

☐ Autre : \_\_\_\_\_

**8 - What is the highest level of education you have achieved?** (Only one answer)

☐ Incomplete primary education or no schooling

☐ Primary school completed

☐ Secondary school

☐ Higher education

☐ Higher education degree / Post-graduation

**9 - In which region(s) have you been mining for gold since March 2020?**

(One or more answers)

☐ Brazil ☐ French Guiana ☐ Suriname ☐ Guyana ☐ Venezuela

☐ Other: \_\_\_\_\_

**10 - In how many different gold mining sites have you worked since March 2020?**

(free answer)

\_\_\_\_\_

**11 - In which region(s) have you travelled since Mars 2020?** (One or more answers)

☐ Brazil ☐ French Guiana ☐ Suriname ☐ Guyana ☐ Venezuela

☐ Other: \_\_\_\_\_

**12 - What job are you currently doing?** (Only one answer)

☐ I work on a gold mining site

☐ I do another job

☐ I don't do anything

☐ Other: \_\_\_\_\_

**13 - How would you rate your overall health?** (Only one answer)

☐ Excellent ☐ Very good ☐ Good ☐ Reasonable ☐ Poor

**14 - Do you have one of this medical history?** (One or more answers)

- ☐Diabetes    ☐Hypertension    ☐HIV    ☐Cancer  
☐No

**15 - Do you take medication every day for an orther disease than Covid-19?** (Only one answer)

- ☐Yes   ☐No

## C - Knowledge and perceptions of Covid-19

**16 - How did you hear about Covid-19 the first time?** (Only one answer)

- ☐Radio   ☐Television    ☐Social networks    ☐Print media  
☐Word of mouth    ☐Doctor/health professional  
☐Other: \_\_\_\_\_  
☐I don't know / I don't remember  
☐I have never heard about Covid-19

**17 - Do you think Covid-19 really exists?** (Only one answer)

- ☐Yes   ☐No

**17 - A - If yes, in which country did the coronavirus (Covid-19) appear?** (Only one answer)

- ☐France    ☐Brazil    ☐China    ☐United States    ☐Portugal  
☐Other: \_\_\_\_\_

**17 - B - If yes, in your opinion, what is the origin of the Covid-19?** (Open question, one or more answer)

- ☐Transmission by contact with an animal  
☐Accidental leak from a laboratory.  
☐Propagated by the military to decrease the world population  
☐Created by laboratories to sell vaccines.  
☐I don't know.  
☐Other: \_\_\_\_\_

**18 - According to you, what are the symptoms of Covid-19?** (One or more answers)

- ☐Fever   ☐Cough   ☐Lack of air   ☐Sore throat   ☐Runny or stuffy nose  
☐Muscle or body aches   ☐Headaches   ☐Tiredness   ☐Diarrhea  
☐Loss of taste   ☐Loss of smell  
☐Other: \_\_\_\_\_  
☐No symptoms

**19 - In your opinion, does a person who has no symptoms of coronavirus can still be contagious?** (Only one answer)

☐Yes ☐No

**20 - : Which of the following best describes the mode of propagation of Covid-19?** (Open question, one or more answer)

- ☐Human contact, coughing or sneezing ☐Pet contact  
☐Consumption of game meat ☐Mosquito bites ☐Dirt or pollution  
☐Sexual relationship ☐Air  
☐Other: \_\_\_\_\_

**21 - Do you think you have risk factors for a severe form of Covid-19?** (Only one answer)

- ☐Yes ☐No  
☐Don't know

**21 - A - If yes, which ones?** (Free text) \_\_\_\_\_  
\_\_\_\_\_

**22 - Which of the following people are at risk of developing a severe form of Covid-19?** (Open question, one or more answer)

- ☐People of certain religions  
☐The elderly  
☐Babies and young children  
☐People already suffering from certain diseases  
☐People with a certain ethnic background  
☐None of the above  
☐Other: \_\_\_\_\_

**23 - How effective is hand washing in preventing the spread of Covid-19?** (One answer only)

- ☐Extremely efficient ☐Very effective ☐Moderately effective  
☐Not very effective ☐Not effective

**24 - How effective is the use of a face mask in preventing the spread of Covid-19?** (Only one answer)

- ☐Extremely efficient ☐Very effective ☐Moderately effective  
☐Not very effective ☐Not effective

**25 - What measures are effective in preventing the spread of Covid-19?** (Open question, one or more answer)

- ☐Cover your mouth and nose when you cough or sneeze  
☐Avoid close contact with people who have a fever or cough  
☐Stay more than three feet away from other people when you are in public.  
☐Avoiding crowds of unknown people  
☐Stay on the gold mining sites and avoid returning to town.

- ☐ Avoid touching eyes, nose and mouth with unwashed hands.
- ☐ Take herbal supplements, tea and traditional remedies.
- ☐ Taking antibiotics (chloroquine, Ivermectin, azithromycin.. ) or other medications.
- ☐ Taking vitamins
- ☐ Eating garlic, ginger or lemon
- ☐ Drinking alcoholic beverages
- ☐ Smoking tobacco
- ☐ Be careful when opening letters or packages
- ☐ Be vaccinated against flu/Influenza
- ☐ Cleaning or disinfecting your environment
- ☐ Cleaning or disinfecting your mobile phone
- ☐ Other: \_\_\_\_\_
- ☐ None of the options

**26 - Do you think that Covid-19 will disappear one day? (Only one answer)**

- ☐ Yes, of course
- ☐ Yes, probably.
- ☐ Not on
- ☐ Probably not
- ☐ Certainly not

**27 - How dangerous do you think Covid-19 is for your community? (Only one answer)**

- ☐ Nothing dangerous      ☐ Somewhat dangerous      ☐ Moderately dangerous
- ☐ Very dangerous      ☐ Extremely dangerous

**28 - How do you assess the level of seriousness of the Coronavirus (Covid-19) disease for humanity? (Only one answer)**

- ☐ Not serious      ☐ Serious      ☐ Very serious      ☐ Don't know

**29 - How do you feel about the coronavirus pandemic (Covid-19)? (Only one answer)**

- ☐ Not at all concerned      ☐ Somewhat not concerned      ☐ Somewhat concerned      ☐ Very concerned

## D - Attitudes and practices towards Covid-19

**30 - How has your work changed since the beginning of the Covid-19 pandemic? (One answer only)**

- ☐ Not much has changed
- ☐ I started working on the gold mining sites
- ☐ I stopped working at the gold mining sites
- ☐ I had to change my gold mining site.

**31 - Have you cancelled or reduced your travel since the start of the Covid-19 pandemic?**

(One or more answers)

☐ Yes, due to restrictions and controls

☐ Yes, for fear of getting sick

☐ Yes, for fear of spreading the virus

☐ No, I had planned to travel and I stuck to my plans

☐ No, I wasn't planning to travel.

☐ Other: \_\_\_\_\_

**32 - How often do you respect social distancing ?(Only one answer)**

☐ Never ☐ Rarely ☐ Sometimes ☐ Often ☐ Always

**33 - How often do you sanitize your hands with soap or hydroalcoholic solution? (Only one answer)**

☐ Never ☐ Rarely ☐ Sometimes ☐ Often ☐ Always

**34 - How often do you wear a face mask when you are with people? (Only one answer)**

☐ Never ☐ Rarely ☐ Sometimes ☐ Often ☐ Always

**35 - Did you take any medication to protect yourself from Covid-19? (One or more answers)**

☐ Yes, when I was on a gold mining site

☐ Yeah, when I was in town

☐ No

**35 - A - If yes, which ones? (One or more answers)**

☐ Ivermectin ☐ Chloroquine ☐ Azithromycin ☐ Vitamins :

☐ Yes but I don't know the name.

☐ Yes, other :

\_\_\_\_\_

**35 - A1 - If Chloroquine, how often and for how long did you take chloroquine? (Only one answer)**

☐ Once a month ☐ Once a week ☐ Once a day

☐ Only when in contact with sick people.

☐ Other: \_\_\_\_\_

How long? (free text) \_\_\_\_\_

**35 - A2 - If Ivermectin, how often and for how long did you take Ivermectin? (Only one answer)**

☐ Once a month ☐ Once a week ☐ Once a day

☐ Only when in contact with sick people.

☐ Other: \_\_\_\_\_

How long? (free text) \_\_\_\_\_

**35 - A3 - If Azithromycin, how often and for how long did you take azithromycin? (Only one answer)**

☐ Once a month ☐ Once a week ☐ Once a day

☐ Only when in contact with sick people.

☐ Other: \_\_\_\_\_

How long? (free text) \_\_\_\_\_

**35 - B - If yes, where did you get these medicines ? (One or more answers)**

☐ Brazil ☐ Guyana ☐ Suriname ☐ French Guiana

☐ Other: \_\_\_\_\_

**35 - C - If yes, how did you get these medicines ? (One or more answers)**

☐ Commercial Pharmacy

☐ Other shops in a village or town

☐ Seller on the gold mining site

☐ Health dispensary or clinic

☐ Hospital

☐ Other: \_\_\_\_\_

**36 - Have you ever made a Covid-19 test? (One or more answers)**

☐ Yes, in a hospital or health center

☐ Yes, during a detection campaign in a town or village

☐ Yes in a garimpo (by my self or someone else)

☐ Other: \_\_\_\_\_

☐ No

**36 - A - If yes, for what reason(s)? (One or more answers)**

☐ Because I had symptoms

☐ Because I was in contact with sick people

☐ In detection when I was asymptomatic

☐ I don't know/remember

**36 - B - If yes, how many times have you done this since the beginning of the pandemic in March 2020? (Only one answer)**

☐ Only once ☐ 2 to 5 times ☐ 6 to 10 times ☐ >10 times

**37 - Do you think you have been sick from Covid-19 since the beginning of the pandemic in March 2020? (Only one answer)**

☐ Yes, I did a nasal test and it was positive

☐ Yes, I did a blood test and it was positive

☐ Yes, I had the symptoms of Covid-19

☐ No

☐ I don't know/I can't remember

**37- A – If yes, when was it ? (Open question)**

---

**37 - B - If yes, what were the symptoms you felt? (One or more answers)**

- ☐ Fever ☐ Cough ☐ Lack of air ☐ Sore throat  
☐ Muscle or body aches ☐ Headaches ☐ Tiredness ☐ Diarrhea  
☐ Loss of taste ☐ Loss of sense of smell ☐ Runny or stuffy nose  
☐ Other: \_\_\_\_\_  
☐ No symptoms

**37 - C - If yes, were you in a gold mining site at that time? (Only one answer)**

- ☐ Yes ☐ No  
☐ I don't know, I can't remember

**37 - D - If yes, in which country were you at that time? (Only one answer)**

- ☐ Brazil ☐ Suriname ☐ French Guiana ☐ Guyana ☐ Venezuela  
☐ Another South American country  
☐ Other: \_\_\_\_\_

**37 - E - If yes, did you consult or were you followed by health professionals during your Covid-19? (One or more answers)**

- ☐ No  
☐ Yes, in a health center in a town or village  
☐ Yes, a private doctor  
☐ Yes, I was hospitalized

**37 - F - If yes, did you take medication to cure this illness? (One or more answers)**

- ☐ Ivermectin ☐ Chloroquine ☐ Azithromycin ☐ Vitamins :  
☐ Yes, other : \_\_\_\_\_  
☐ Yes but I don't know the name.  
☐ No

**37 - F1 - If yes, do you think those medicines have been effective? (Only one answer)**

- ☐ Extremely efficient ☐ Very effective ☐ Moderately effective  
☐ Not very effective ☐ Not effective

**37 - G - If yes, did you get yourself into quarantine voluntarily when you had the Covid-19? (including from your family, friends and colleagues) (One answer only)**

- ☐ Yes ☐ No  
☐ I don't know/ I don't remember

**37 - G1 - If yes, for how many days? (Only one answer)**



- 
- ☐ Just the time for symptoms.
  - ☐ I don't know/I don't remember

**37 - G2 - If not, why not? (One or more answers)**

- ☐ I didn't know I had to get myself in quarantine
- ☐ I couldn't stop working
- ☐ I couldn't isolate myself from my family.
- ☐ I don't think it is usefull
- ☐ Other: \_\_\_\_\_

**37 - H - If yes, do you think you have any sequels from this disease? (One or more answers)**

- ☐ Fatigue    ☐ Coughing    ☐ Shortness of breath    ☐ Chest pain    ☐ Headache
- ☐ Smell disorder    ☐ Taste disorder
- ☐ Muscle pain
- ☐ Other: \_\_\_\_\_
- ☐ No

**37 - I - If yes, do you think you have been sick from Covid-19 a second time since the beginning of the pandemic? (Only one answer)**

- ☐ Yes, I did a nasal test and it was positive.
- ☐ Yes, I did a blood test and it was positive.
- ☐ Yes, I had the symptoms of Covid-19.
- ☐ No
- ☐ I don't know, I can't remember

**38 - Did you have relatives affected by Covid-19? (One or more answers)**

- ☐ Yes, members of my family
- ☐ Yes, friends
- ☐ Yes, colleagues at the gold mining site
- ☐ No
- ☐ I don't know.
- ☐ Other: \_\_\_\_\_

**39 - Did you have any relatives who died from Covid-19? (One or more answers)**

- ☐ Yes, members of my family
- ☐ Yes, friends
- ☐ Yes, colleagues at the gold mining site
- ☐ Oui autre : \_\_\_\_\_
- ☐ No
- ☐ I don't know.

**40 - How often do you talk about Covid-19 with your relatives? (Only one answer)**

☐ Never   ☐ Rarely   ☐ Sometimes   ☐ Often   ☐ All the time

## E - Attitudes on vaccination against Covid-19

**41 - Are you in favour of vaccination in general? (Only one answer)**

☐ Very favourable   ☐ Somewhat favorable   ☐ Not very favourable  
☐ Not at all favorable  
☐ Don't know  
☐ Other: \_\_\_\_\_

**42 - Do you trust the information provided by the health authorities concerning vaccination in general? (Only one answer)**

☐ Yes, quite   ☐ Rather yes  
☐ No, rather not   ☐ No, not at all  
☐ Don't know  
☐ Other: \_\_\_\_\_

**43 - Do you think that vaccination against Covid-19 is effective? (Only one answer)**

☐ Yes, quite   ☐ Rather yes  
☐ No, rather not   ☐ No, not at all  
☐ Don't know  
☐ Other: \_\_\_\_\_

**44 - Do you think that vaccination against Covid-19 is safe? (Only one answer)**

☐ Yes, quite   ☐ Rather yes  
☐ No, rather not   ☐ No, not at all  
☐ Don't know  
☐ Other: \_\_\_\_\_

**45 - Have you ever been vaccinated against Covid-19? (Only one answer)**

☐ Yes   ☐ No

**45 - A - If yes, where were you vaccinated? (One or more answers)**

☐ Brazil   ☐ Guyana   ☐ Suriname   ☐ French Guiana  
☐ Other: \_\_\_\_\_

**45 - B - If yes, how did you get vaccinated? (One or more answers)**

☐ In a hospital or health center

- ☐ During a vaccination campaign in a town or village
- ☐ During a vaccination campaign on the gold mining site
- ☐ Other: \_\_\_\_\_
- ☐ No

**45 - C - If yes, do you know which vaccine you received? (One or more answers)**

- ☐ Pfizer    ☐ Moderna    ☐ Astrazeneca    ☐ CoronaVac    ☐ Sinopharm
- ☐ I don't know / I don't remember
- ☐ Other: \_\_\_\_\_

**45 - D - If yes, how many doses did you receive? (Only one answer)**

- ☐ 1 dose    ☐ 2 doses    ☐ 3 doses
- ☐ I don't know / I don't remember
- ☐ Other: \_\_\_\_\_

**45 - E - Where do you plan to take your next dose of vaccine? (Only one answer)**

- ☐ In a hospital or health center in France
- ☐ In a hospital or health center in Suriname
- ☐ In a hospital or health center in Brazil
- ☐ During an upcoming vaccination campaign in a town or village
- ☐ Other: \_\_\_\_\_
- ☐ I don't know.
- ☐ I do not wish to receive an additional injection of vaccine

**45 – E1 - If you do not want to receive a new dose of vaccine, why ? (One or more answer)**

- ☐ I think the epidemic is over
- ☐ I think I am already sufficiently protected against Covid-19
- ☐ I had serious side effects after the first vaccine dose.
- ☐ Other: \_\_\_\_\_

**45 - F - If not, why did you not get vaccinated against Covid-19? (One or more answers)**

- ☐ Not enough informations about vaccination
- ☐ No possibility of vaccination where I am
- ☐ Not available for my situation and age range.
- ☐ No social security
- ☐ No access to the vaccination centre
- ☐ I don't think it's safe
- ☐ I don't think it works.
- ☐ Other: \_\_\_\_\_

**46 - Do you trust Brazilian authorities in the management of Covid-19 health crisis ?** (Only one answer)

☐ Yes, quite    ☐ Rather yes

☐ No, rather not    ☐ No, not at all

☐ Don't know

☐ Other: \_\_\_\_\_

**47 - Do you trust French authorities for the management of Covid-19 health crisis ?** (Only one answer)

☐ Yes, quite    ☐ Rather yes

☐ No, rather not    ☐ No, not at all

☐ Don't know

☐ Other: \_\_\_\_\_

**48 - Do you trust Surinamese authorities to manage the Covid-19 health crisis ?** (Only one answer)

☐ Yes, quite a bit    ☐ Rather yes

☐ No, not really    ☐ No, not at all

☐ Don't know

☐ Other: \_\_\_\_\_

**Is there anything else you would like to add?** (Free text)

---

---

---

---

---

---

---
